# Supplementary material
Source: Research Square preprint supplement (doi:10.21203/rs.3.rs-9255559/v1)
Supplement: Supplementary file 1 [file a38d66da1ce7675c217b6a66.docx]

Supplementary Table 1. Proportional hazards assumption test for time-fixed covariates

| Covariate | Chi-square | Degree of freedom | *P*-value |
| --- | --- | --- | --- |
| Age | 0.01 | 1 | 0.903 |
| Hypertension | 0.81 | 1 | 0.368 |
| Tumor size | 0.67 | 1 | 0.412 |
| Cavernous sinus invasion | 3.44 | 1 | 0.064 |
| GLOBAL | 4.28 | 4 | 0.370 |

*, *P*-value < .05

Chi-sq, chi-square; df, degrees of freedom.

Supplementary Table 2. Univariable Cox regression for total remission

| Variable | HR | 95% CI | *P*-value |
| --- | --- | --- | --- |
| Age | 1.01 | 1.00 – 1.03 | 0.017* |
| Hypertension | 1.32 | 0.94 – 1.87 | 0.111 |
| Tumor size (cm) | 0.54 | 0.44 – 0.66 | p < 0.001* |
| Cavernous sinus invasion | 0.39 | 0.27 – 0.55 | P < 0.001* |

*, *P*-value < 0.05

HR, Hazard ratio; CI, Confidence Interval.
